# Supplementary material for: How Are Self-Reported Physical and Mental Health Conditions Related to Vaping Activities among Smokers and Quitters: Findings from the ITC Four Country Smoking and Vaping Wave 1 Survey
Source: Int J Environ Res Public Health. 2019 Apr 19;16(8):1412. doi: 10.3390/ijerph16081412 (PMC6518008; doi:10.3390/ijerph16081412)
Supplement: Supplementary file 1 [file ijerph-16-01412-s001.pdf]

**Table S1.** Association between self-reported health problems and use of vaping on the last quit attempt among current daily smokers ( $n = 4399$ , in all 4 countries).

| Health condition                  | Use of vaping products to quit<br>(% yes) |
|-----------------------------------|-------------------------------------------|
| Overall                           | 27.23                                     |
| <b>Depression</b>                 | (Ref)                                     |
| No                                | 26.41                                     |
| Yes                               | 30.43                                     |
| Adjusted OR(95%CI) #              | 1.12 (0.91–1.43)                          |
| <b>Anxiety</b>                    | (Ref)                                     |
| No                                | 26.83                                     |
| Yes                               | 29.42                                     |
| Adjusted OR(95%CI)                | 1.12 (0.81–1.34)                          |
| <b>Alcohol problem</b>            | (Ref)                                     |
| No                                | 27.41                                     |
| Yes                               | 22.12                                     |
| Adjusted OR(95%CI)                | 0.81 (0.51–1.22)                          |
| <b>Severe obesity</b>             | (Ref)                                     |
| No                                | 27.32                                     |
| Yes                               | 28.71                                     |
| Adjusted OR(95%CI)                | 0.91 (0.62–1.53)                          |
| <b>Chronic pain</b>               | (Ref)                                     |
| No                                | 27.62                                     |
| Yes                               | 25.13                                     |
| Adjusted OR(95%CI)                | 0.93 (0.72–1.23)                          |
| <b>Diabetes</b>                   | (Ref)                                     |
| No                                | 27.83                                     |
| Yes                               | 21.34                                     |
| Adjusted OR(95%CI)                | 0.82 (0.62–1.13)                          |
| <b>Heart disease</b>              | (Ref)                                     |
| No                                | 27.71                                     |
| Yes                               | 17.42                                     |
| Adjusted OR(95%CI)                | 0.72 (0.43–0.91)*                         |
| <b>Cancer</b>                     | (Ref)                                     |
| No                                | 27                                        |
| Yes                               | 33.12                                     |
| Adjusted OR(95%CI)                | 1.51 (0.82–2.81)                          |
| <b>Chronic lung disease</b>       | (Ref)                                     |
| No                                | 27.12                                     |
| Yes                               | 28.13                                     |
| Adjusted OR(95%CI)                | 1.00 (0.71–1.52)                          |
| <b>Smoking has damaged health</b> | (Ref)                                     |
| No                                | 32.31                                     |
| Yes                               | 26.73                                     |
| Adjusted OR(95%CI)                | 0.82 (0.63–1.01)                          |
| <b>Smoking will damage health</b> | (Ref)                                     |
| No                                | 22.42                                     |
| Yes                               | 28.41                                     |
| Adjusted OR(95%CI)                | 1.32 (0.83–2.14)                          |

^ In some analyses, the sample size was smaller than the total due to missing cases. #Logistic regression results; all odds ratios (ORs) were adjusted for sex, age, education, and income; “no” health problem group as reference value (ref). This applies to all other health problems. \*Significant at  $p < 0.05$ ; \*\* $p < 0.01$ ; \*\*\*  $p < 0.001$ .
